# Supplementary material for: Historical distribution and host-vector diversity of Francisella tularensis, the causative agent of tularemia, in Ukraine
Source: PubMed Central journal article supplement (PMC4200231; doi:10.1186/s13071-014-0453-2), 2014-10-16

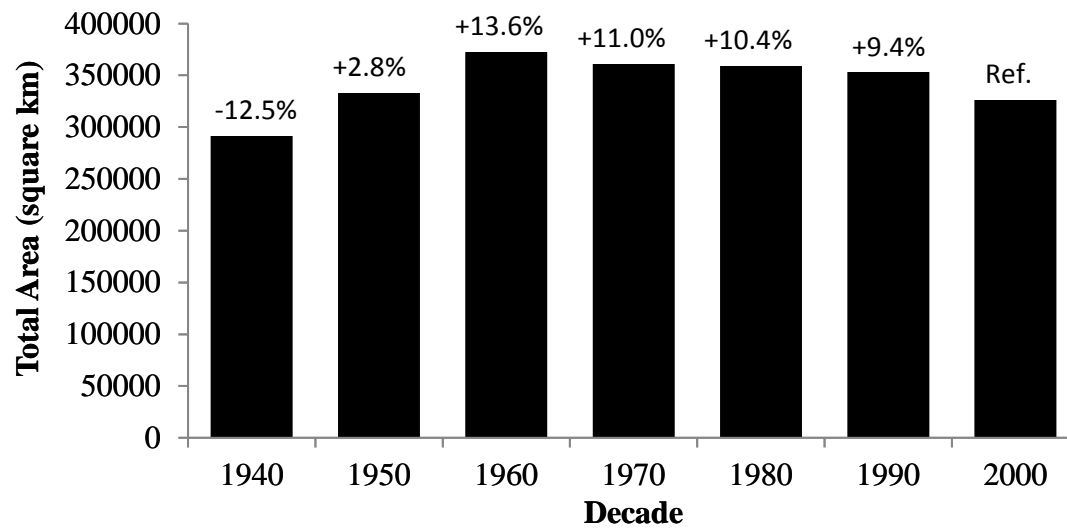

Supplement: 13071_2014_453_MOESM4_ESM.pdf [file 13071_2014_453_MOESM4_ESM.pdf]
